# Supplementary material for: Metabolomics approach reveals annual metabolic variation in roots of Cyathula officinalis Kuan based on gas chromatography–mass spectrum
Source: Springer Nature journal article supplement (doi:10.1186/s13020-017-0133-1), 2017-05-03

Additional file 3. The amount of cyasterone in different growth years.

|                | <i>1 year</i> | <i>2 years</i> | <i>3 years</i> | <i>4 years</i> |
|----------------|---------------|----------------|----------------|----------------|
| Sample 1       | 0.034%        | 0.061%         | 0.069%         | 0.088%         |
| Sample 2       | 0.030%        | 0.068%         | 0.088%         | 0.082%         |
| Sample 3       | 0.041%        | 0.071%         | 0.081%         | 0.091%         |
| Sample 4       | 0.036%        | 0.059%         | 0.072%         | 0.107%         |
| Sample 5       | 0.042%        | 0.053%         | 0.081%         | 0.078%         |
| Sample 6       | 0.032%        | 0.074%         | 0.065%         | 0.082%         |
| Sample 7       | 0.044%        | 0.067%         | 0.074%         | 0.079%         |
| Sample 8       | 0.051%        | 0.065%         | 0.078%         | 0.091%         |
| <b>Average</b> | <b>0.039%</b> | <b>0.065%</b>  | <b>0.076%</b>  | <b>0.087%</b>  |

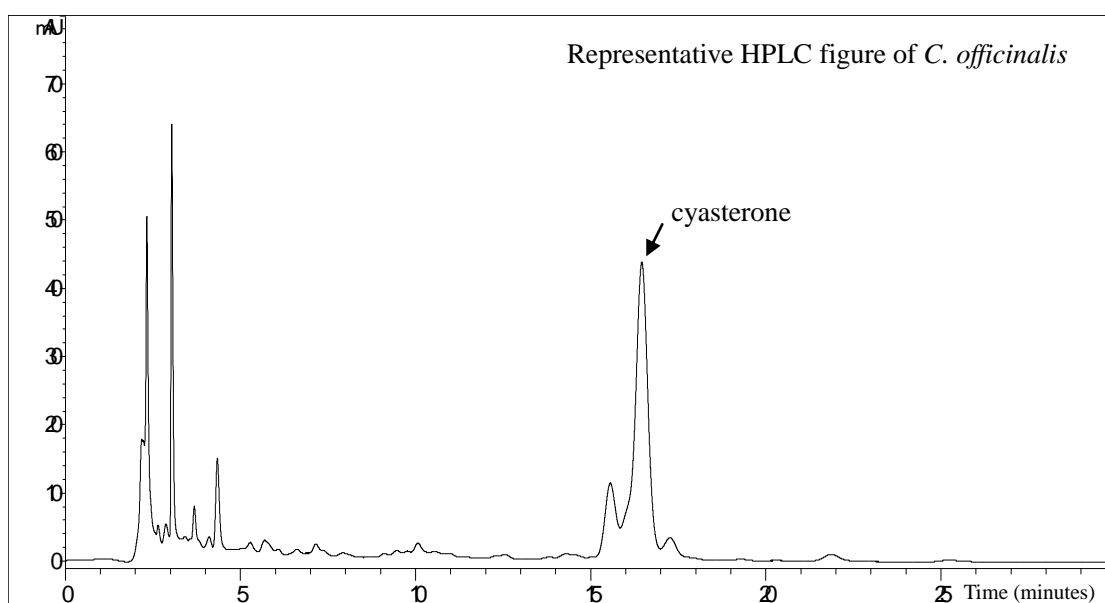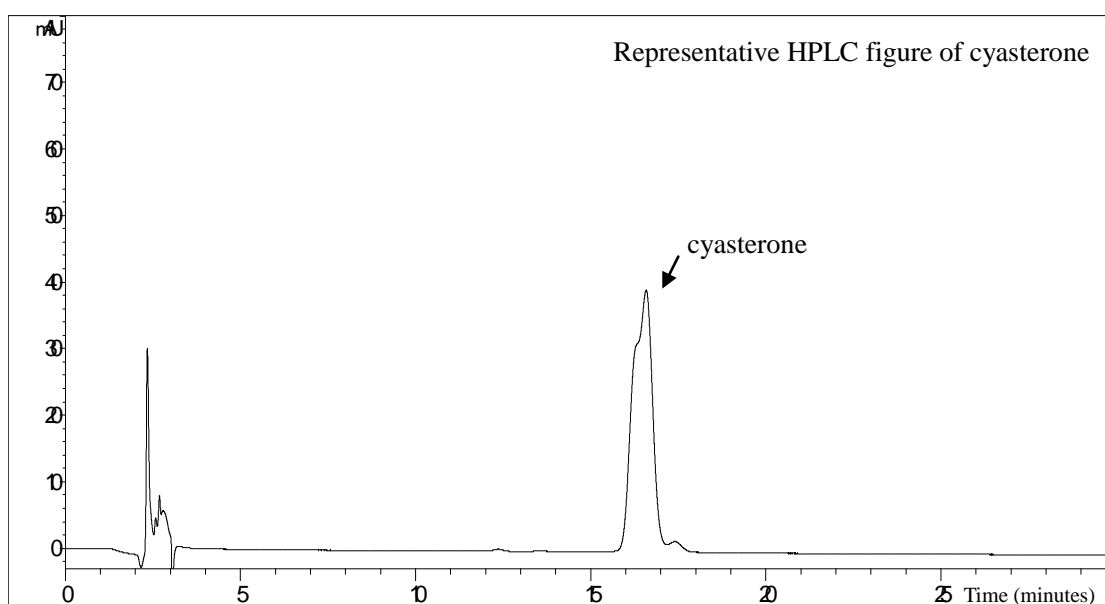

Supplement: MOESM3 [file 12262270]
